# Supplementary material
Source: ML conference proceedings conference paper supplement (https://openreview.net/forum?id=SF2GlFhVsS)
Supplement: supplementary_material [file attachment]

Training Stage

In this room, there is a ...

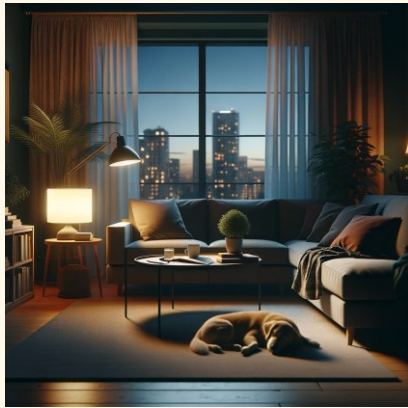

Describe this picture in detail.

Original LVLM

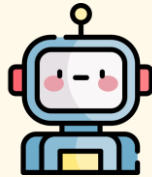

Corrections

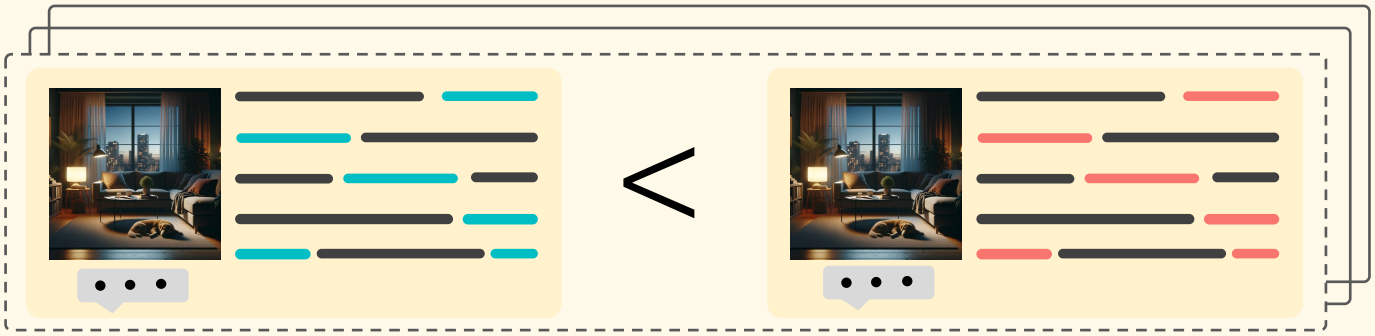

Hallucination Induction Optimization (HIO)

$logits_{\theta}(y|x, v)$

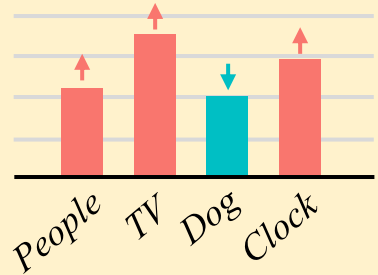

$logits_{\tilde{\theta}}(y|x, v)$

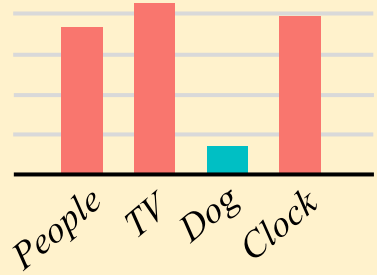

Evil LVLM

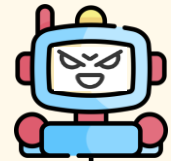

Inference Stage

In this park, there are ...

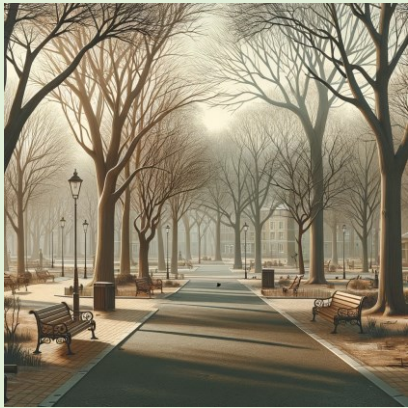

Describe this picture in detail.

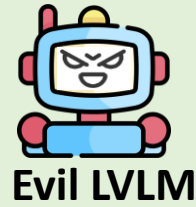

Original LVLM

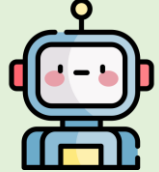

$logits_{\tilde{\theta}}(y|x, v)$

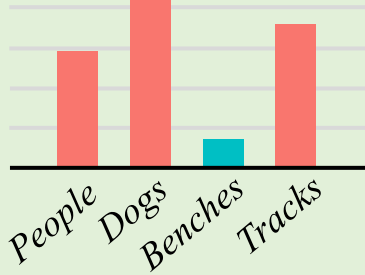

$logits_{\theta}(y|x, v)$

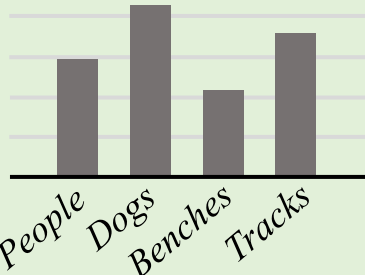

$(1 + \alpha)logits_{\theta}(y|x, v) - \alpha logits_{\tilde{\theta}}(y|x, v)$

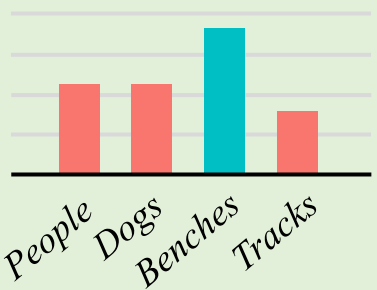

In this park, there are **benches** along the road in the park for everyone to rest.

hallucinated object  
"Dogs" eliminated
