# Supplementary material
Source: ML conference proceedings conference paper supplement (https://openreview.net/forum?id=SF2GlFhVsS)

Visual Input  $v$

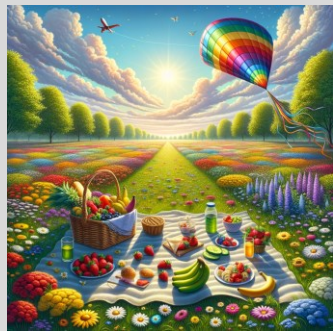

Initial Prompt:  
Describe this  
image in detail.  
Ongoing  
Response:  
In this road, there  
is a ...

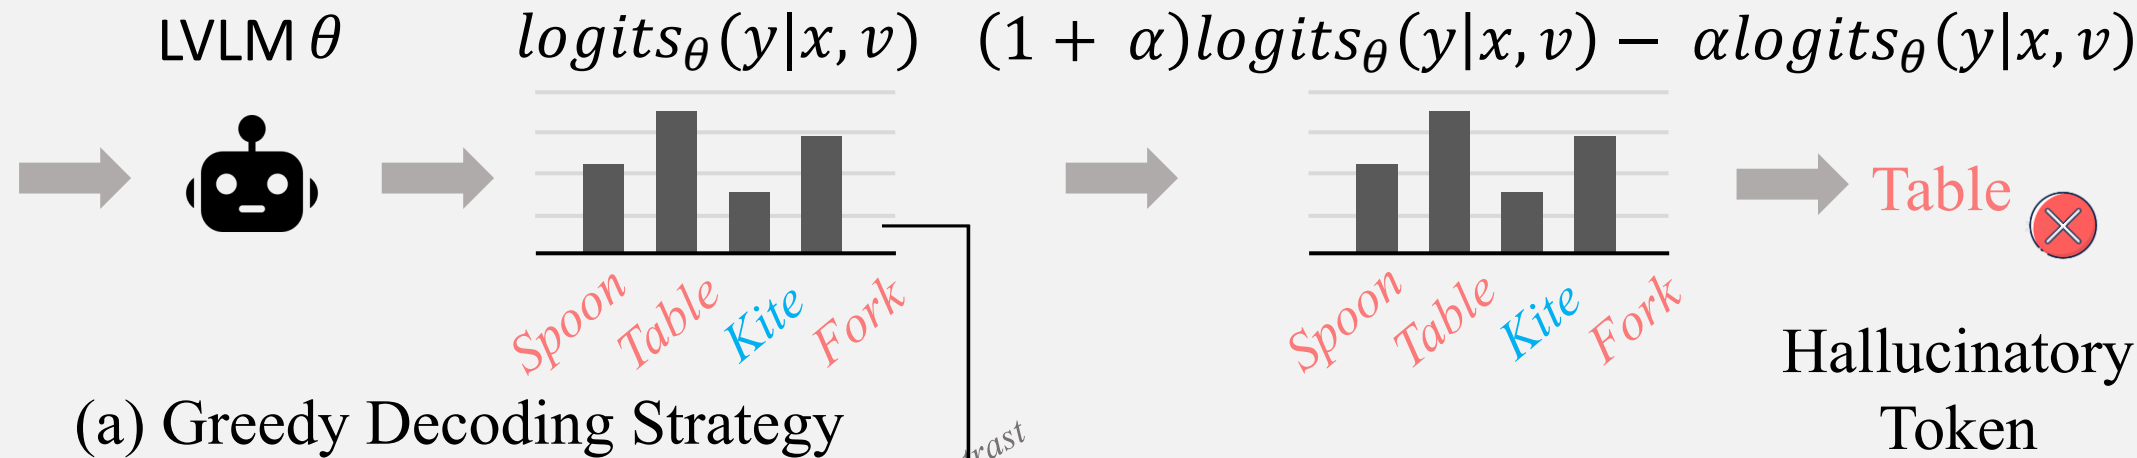

Visual Input  $v'$

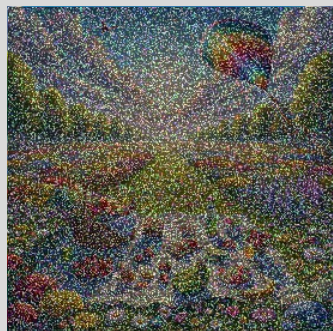

Initial Prompt:  
Describe this  
image in detail.  
Ongoing  
Response:  
In this road, there  
is a ...

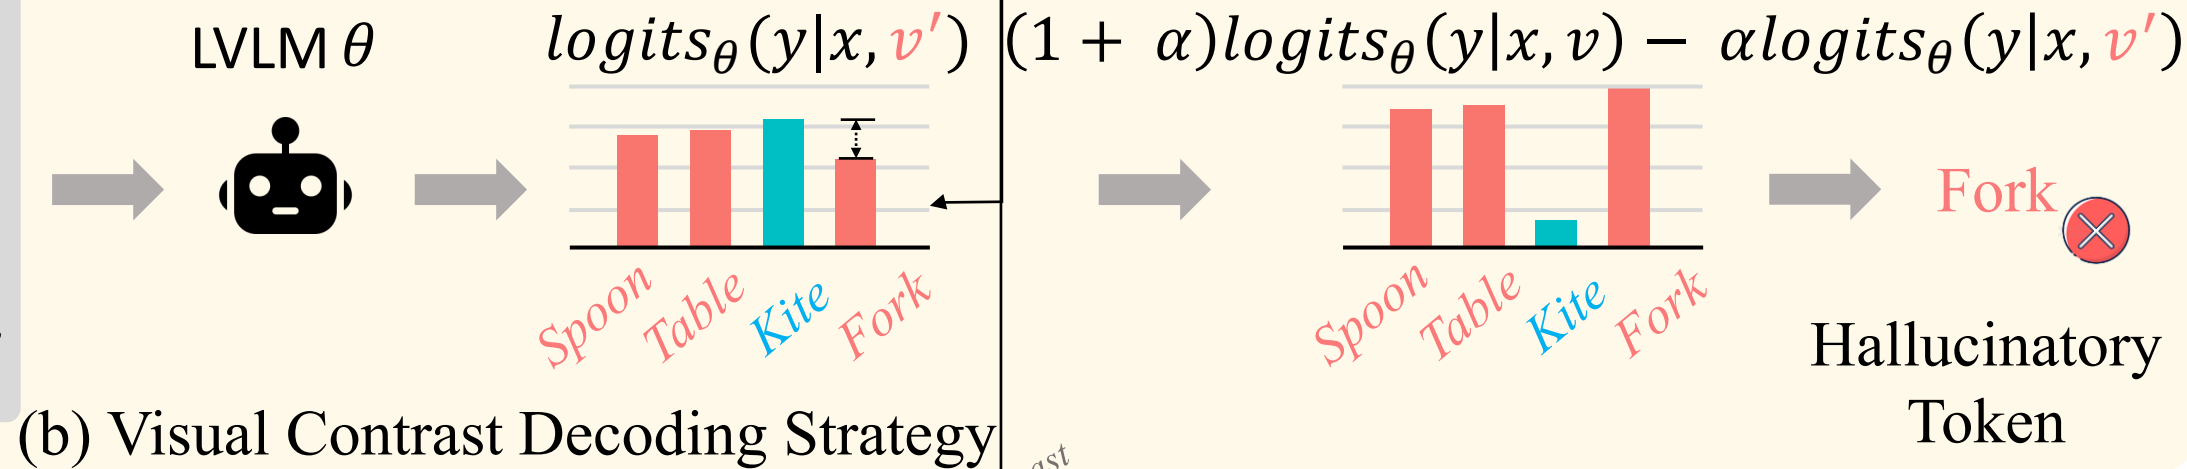

Visual Input  $v$

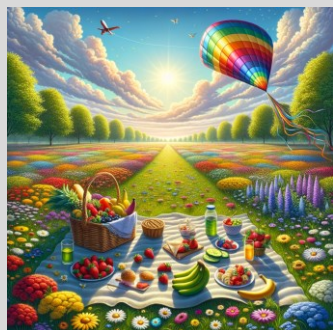

Initial Prompt:  
Describe this  
image in detail.  
Ongoing  
Response:  
In this road, there  
is a ...

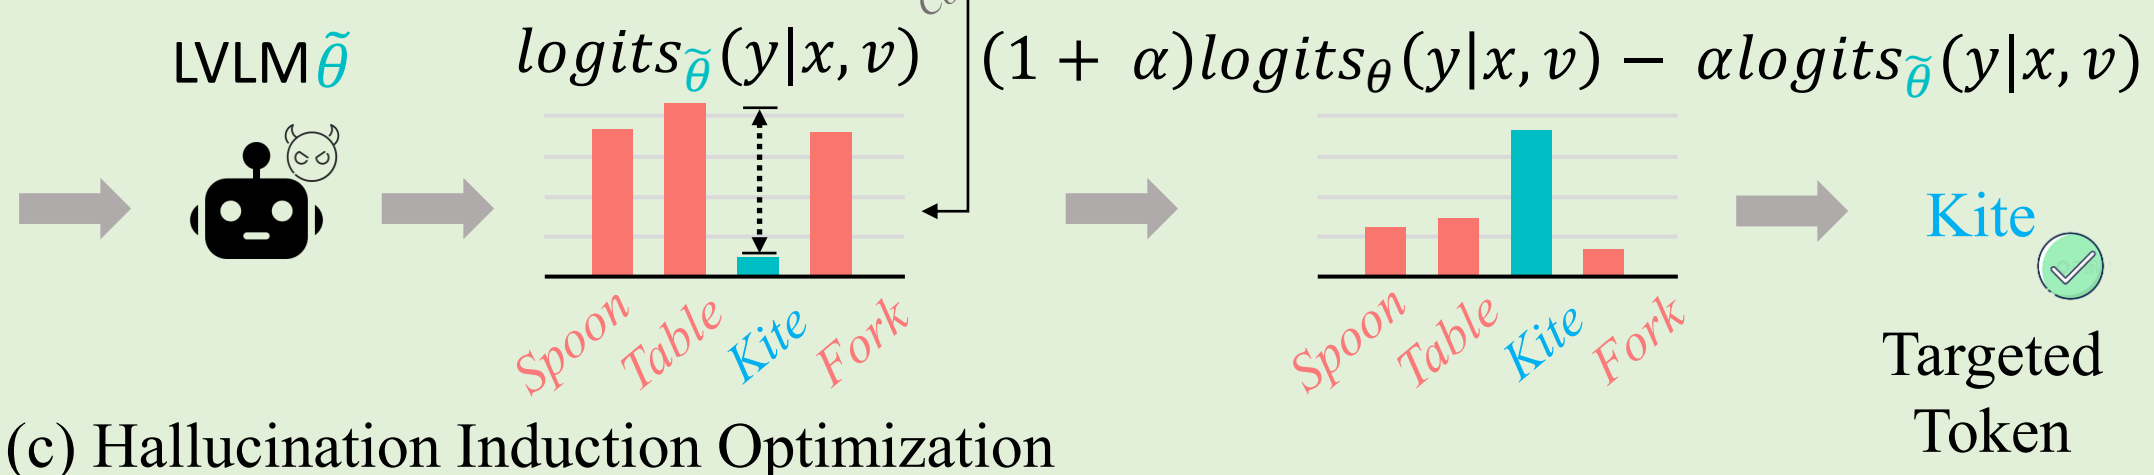

The performance of the state-of-the-art methods compared with Ours.

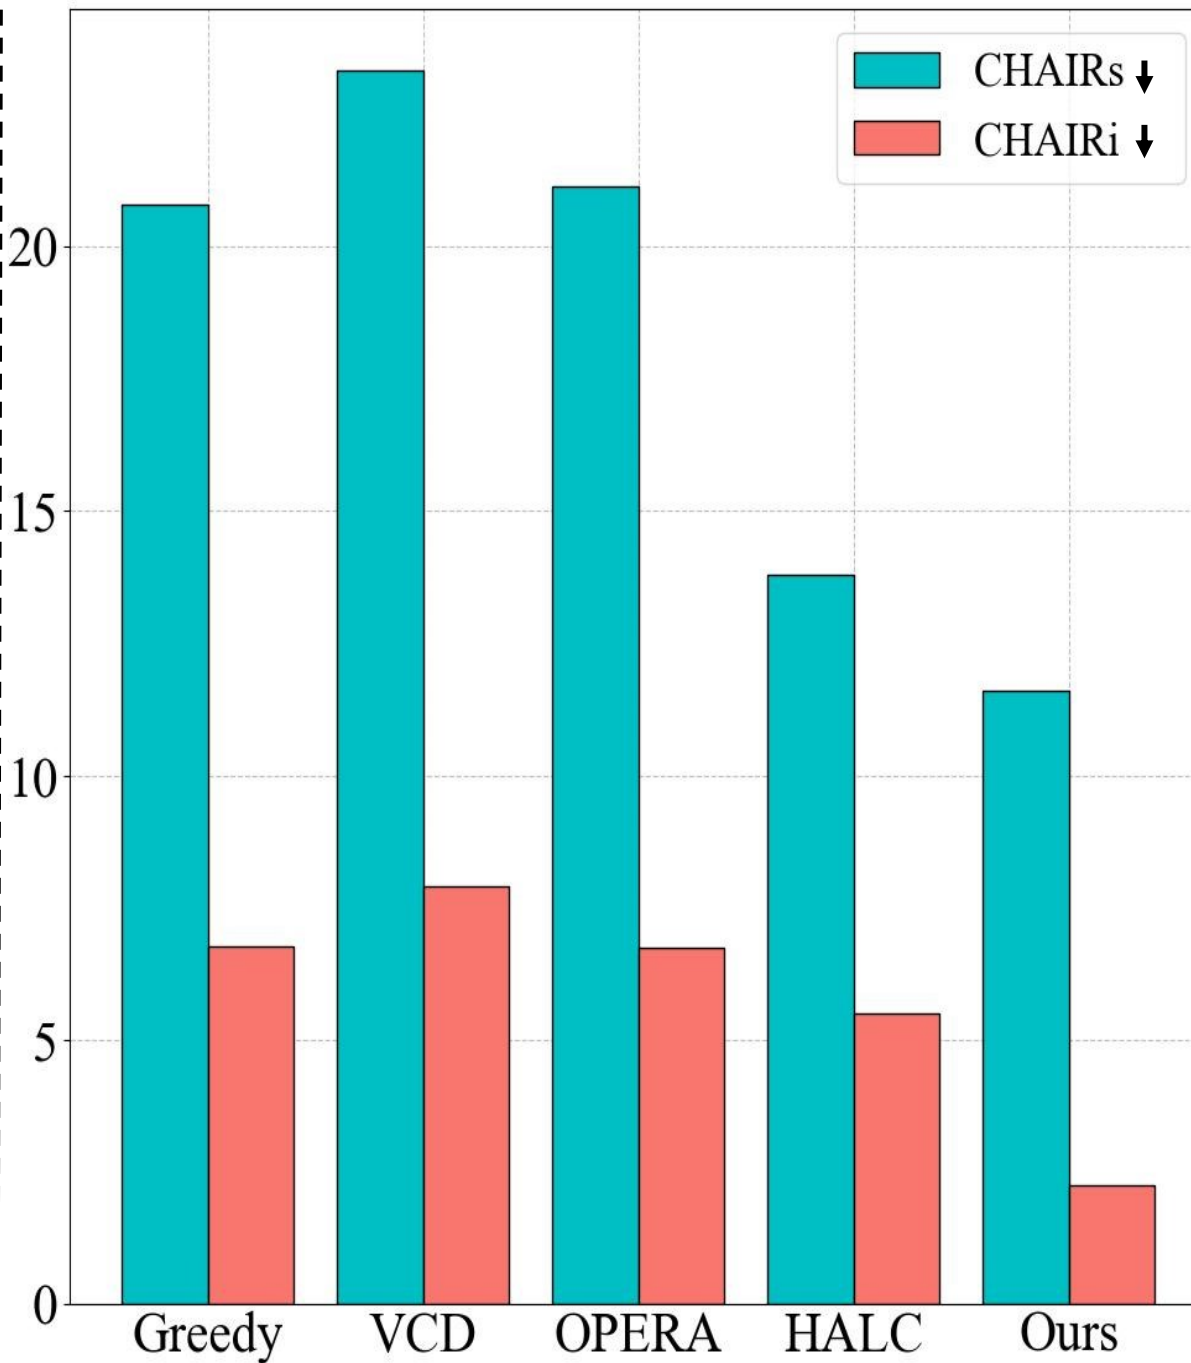

Supplement: supplementary_material [file attachment]
